# Supplementary material
Source: PubMed Central journal article supplement (PMC6176566)
Supplement: pnas.1806635115.sapp.pdf [file pnas.1806635115.sapp.pdf]

Supplementary Information

## **ACSS2 promotes systemic fat storage and utilization through selective regulation of genes involved in lipid metabolism**

Zhiguang Huang, Menglu Zhang, Abigail A. Plec, Sandi Jo Estill, Ling Cai, Joyce J. Repa, Steven L. McKnight, Benjamin P. Tu

Email: [benjamin.tu@utsouthwestern.edu](mailto:benjamin.tu@utsouthwestern.edu)

This PDF file includes:

Figs. S1-S12

Table S1

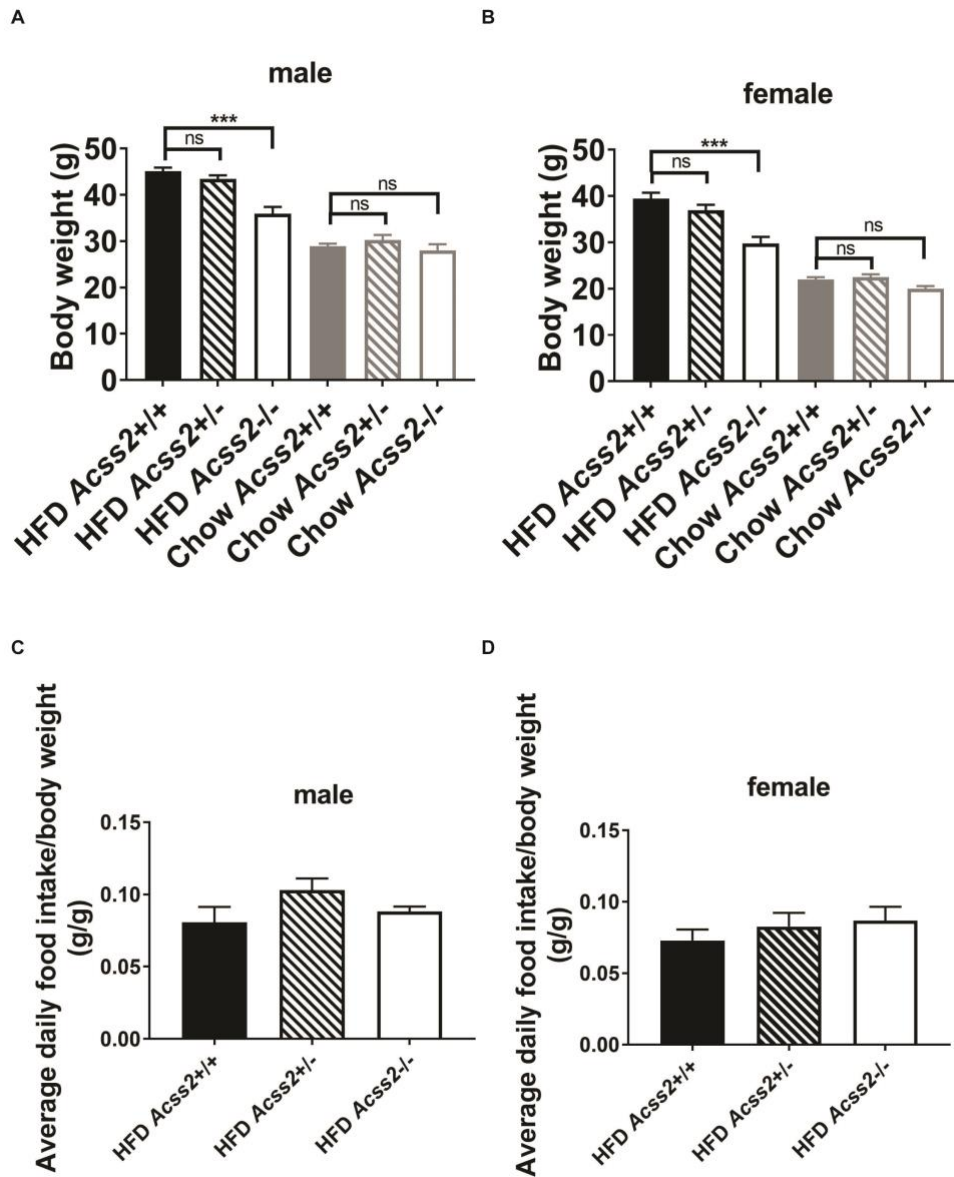

**Fig. S1. (A-B)** Body weights of 20 week-old male (A) or 22 week-old female (B) *Acss2*<sup>+/+</sup>, *Acss2*<sup>+/-</sup>, and *Acss2*<sup>-/-</sup> mice fed chow or HFD starting at 9 weeks as in Fig. 1A, B. **(C-D)** Food intake was measured daily for *Acss2*<sup>+/+</sup>, *Acss2*<sup>+/-</sup>, and *Acss2*<sup>-/-</sup> male (n=6) and female (n=7) mice on HFD. There was no significant difference between genotypes on HFD. Data reflect the mean  $\pm$  SEM.

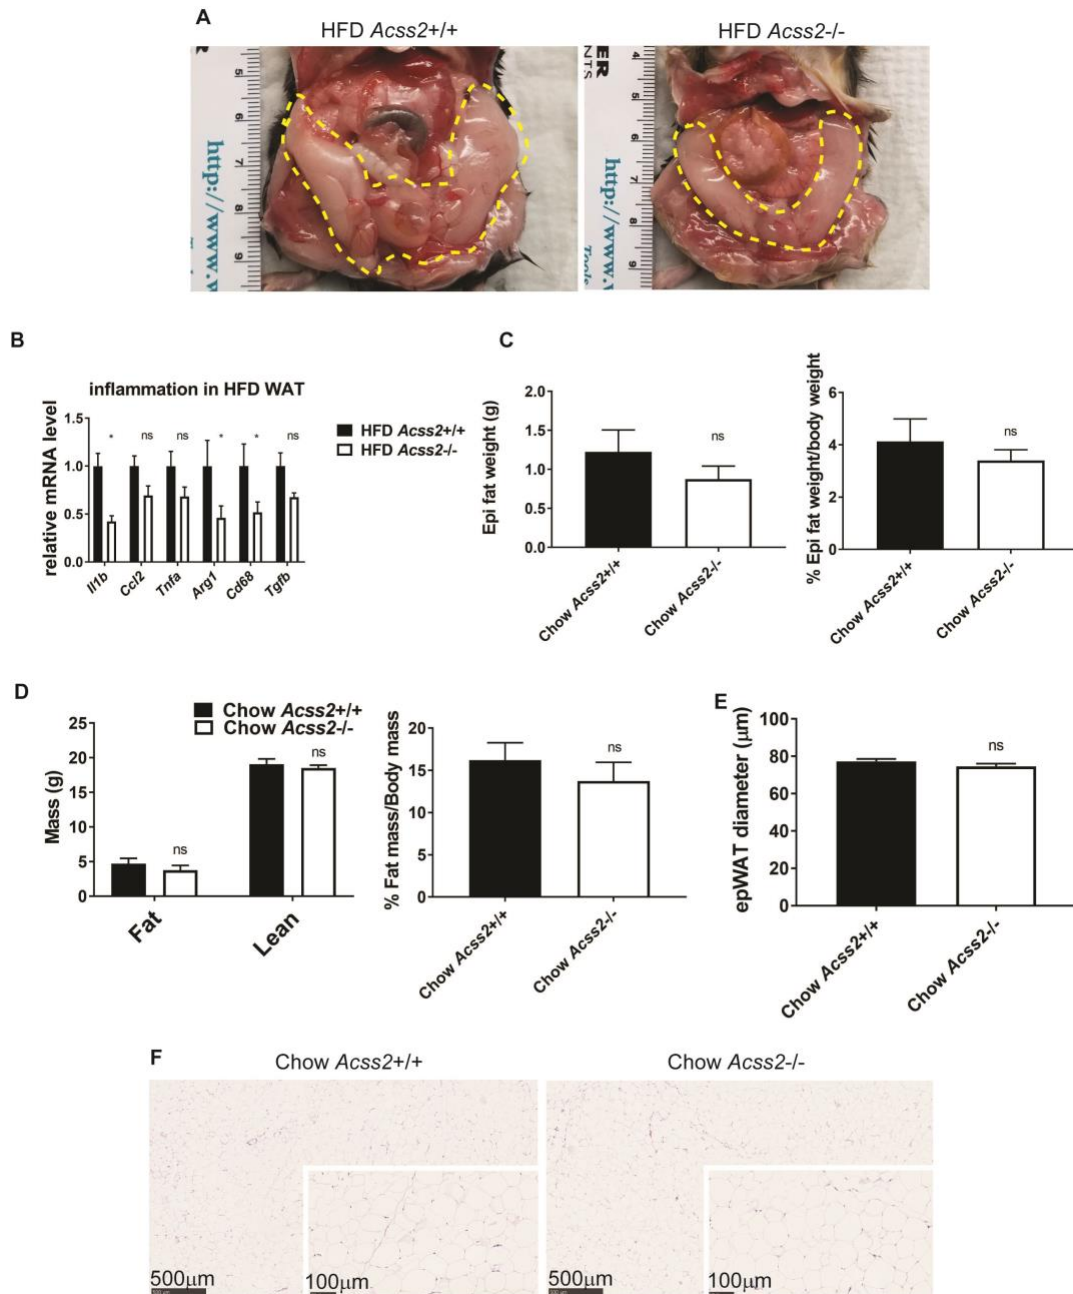

**Fig. S2.** (A) Representative images of epididymal fat pads of *Acss2*<sup>+/+</sup> and *Acss2*<sup>-/-</sup> male mice fed a HFD for 12 weeks starting at 9 weeks of age. (B) mRNA expression of inflammation genes in WAT of male mice on high fat diet (n=7). All data reflect the mean  $\pm$  SEM. \*p<0.05, ns: not significant. (C) Weight of epi fat was measured for *Acss2*<sup>+/+</sup> and *Acss2*<sup>-/-</sup> male mice (n=5) fed in chow diet, and normalized to body weight. Data reflect the mean  $\pm$  SEM. ns: not significant. (D) Fat composition of *Acss2*<sup>+/+</sup> and *Acss2*<sup>-/-</sup> male mice (n=5) on chow diet. Data reflect the mean  $\pm$  SEM. ns: not significant. (E) Diameters were measured from 60 epWAT cells of male *Acss2*<sup>+/+</sup> and *Acss2*<sup>-/-</sup> mice on chow diet (n=3). Data reflect the mean  $\pm$  SEM. ns: not significant. (F) H&E staining of WAT from male *Acss2*<sup>+/+</sup> and *Acss2*<sup>-/-</sup> mice on chow diet. Arrows denote inflammatory cells. Scale bars, 500  $\mu$ m and 100  $\mu$ m.

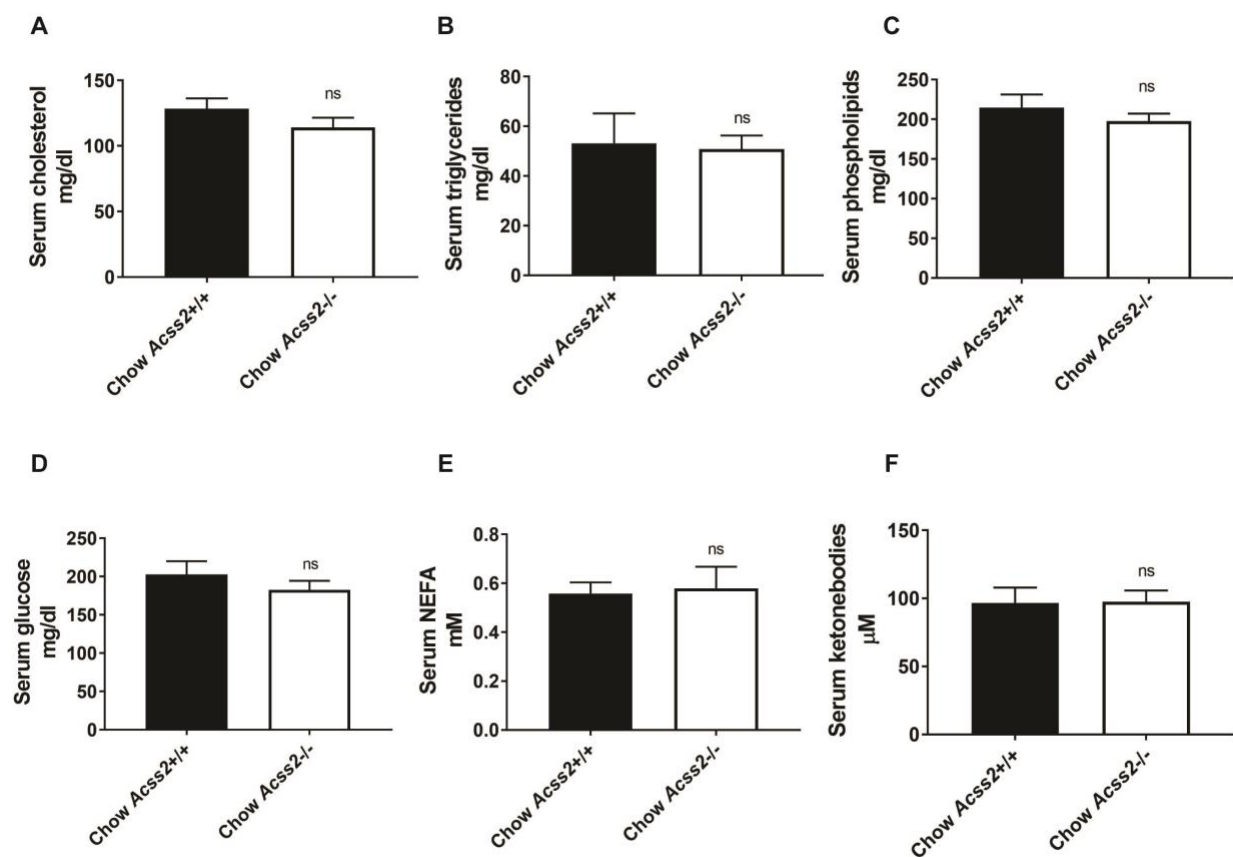

**Fig. S3.** (A to C) Serum cholesterol (A), triglycerides (B), and phospholipids (C) concentration in *Acss2*<sup>+/+</sup> and *Acss2*<sup>-/-</sup> male mice (n=5) on chow diet. Data reflect the mean ± SEM. ns: not significant. (D to F) Serum glucose (D), NEFA (E), and ketone bodies (F) concentration in *Acss2*<sup>+/+</sup> and *Acss2*<sup>-/-</sup> male mice (n=5) on chow diet. Data reflect the mean ± SEM. ns: not significant.

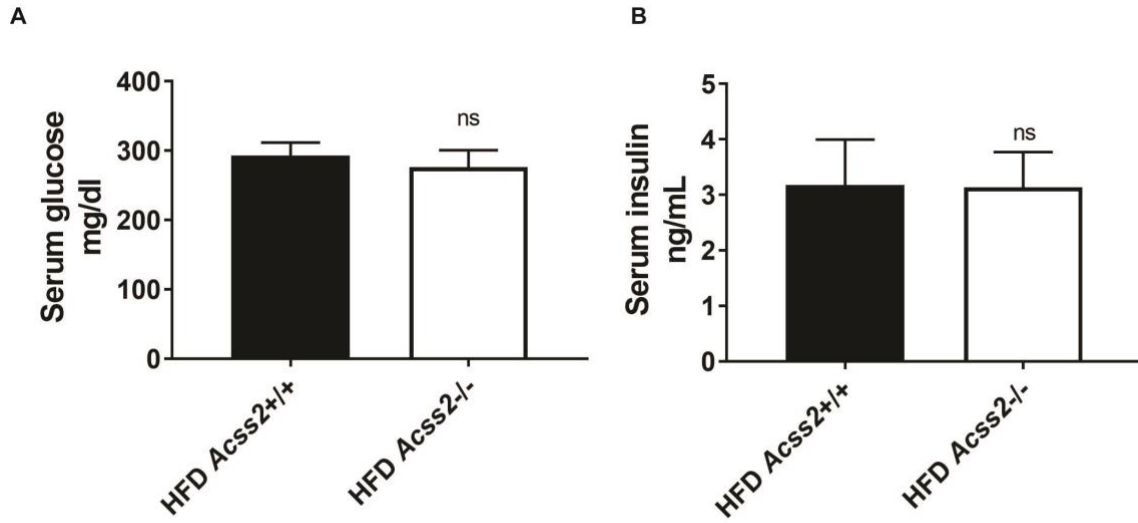

**Fig. S4. (A-B)** Serum glucose (A) (n=12) and insulin (B) (n=5) concentration in *Acss2*<sup>+/+</sup> and *Acss2*<sup>-/-</sup> male mice fed a HFD for 12 weeks starting at 9 weeks of age. Data reflect the mean  $\pm$  SEM. ns: not significant.

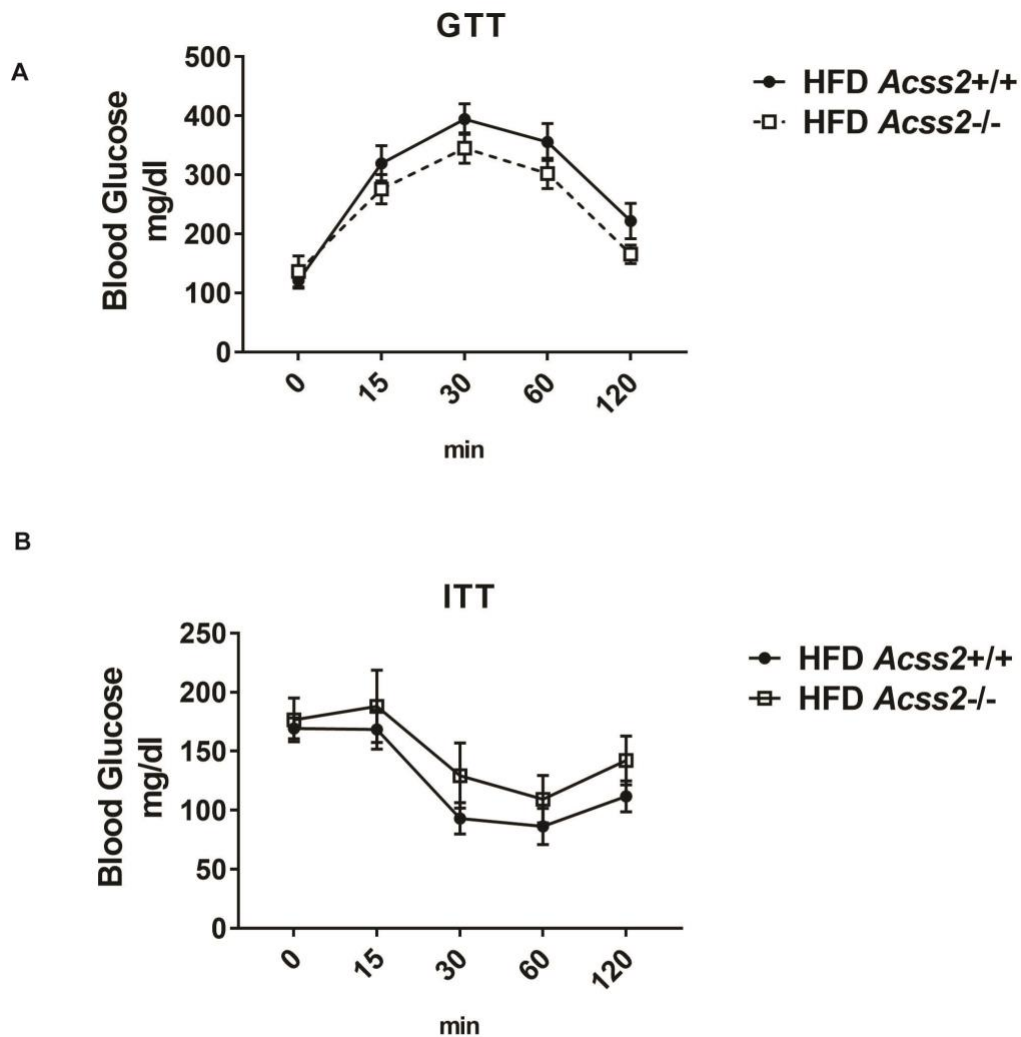

**Fig. S5. (A)** Blood glucose during glucose tolerance test (GTT) in overnight-fasted *Acss2*<sup>+/+</sup> (n=16) and *Acss2*<sup>-/-</sup> (n=14) male mice fed a HFD for 12 weeks. **(B)** Blood glucose during insulin tolerance test (ITT) in 4 h-fasted *Acss2*<sup>+/+</sup> (n=12) and *Acss2*<sup>-/-</sup> (n=9) male mice fed a HFD for 12 weeks. Data reflect the mean  $\pm$  SEM.

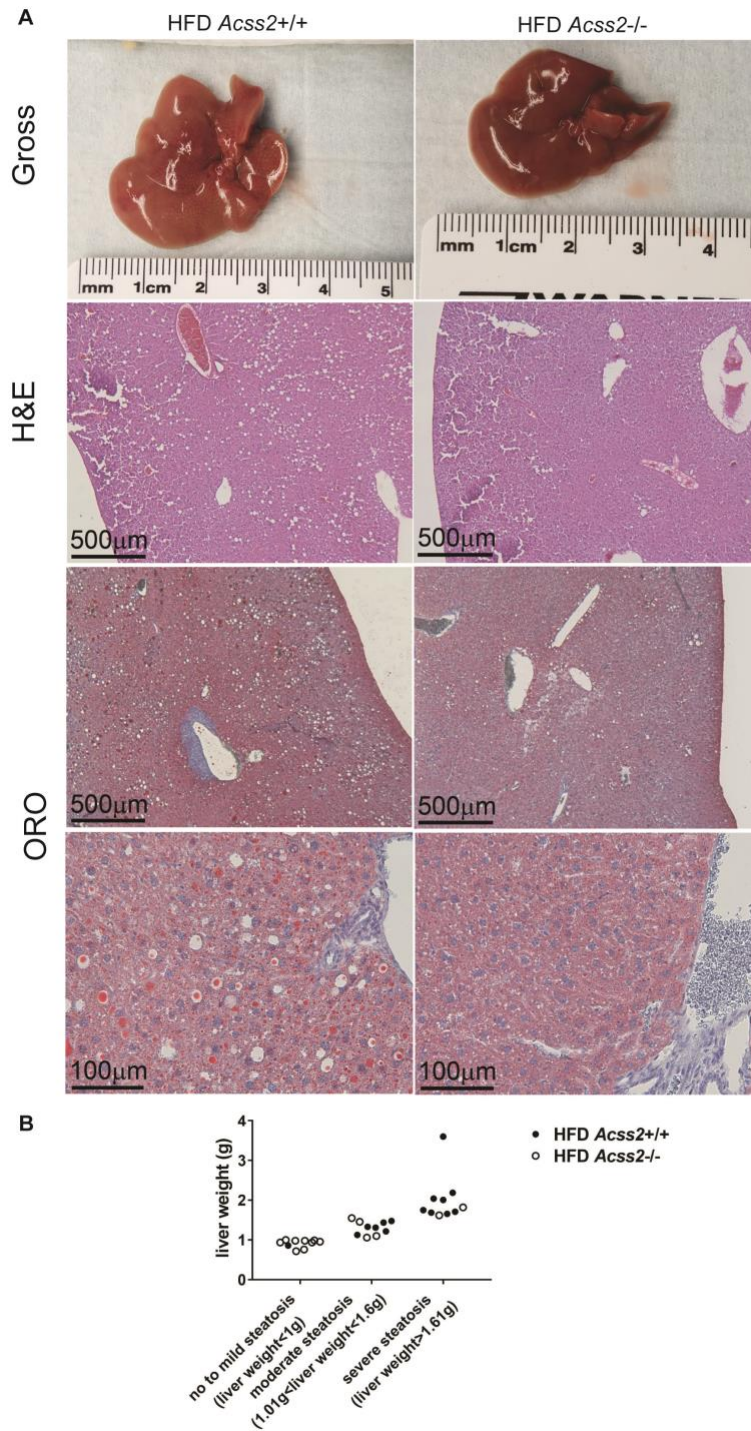

**Fig. S6. (A)** Gross, Haematoxylin and eosin (H&E), and oil red O images of livers from additional representative male mice fed a HFD for 12 weeks. Scale bars, 500  $\mu\text{m}$  and 100  $\mu\text{m}$ . **(B)** Distribution of hepatic steatosis. *Acss2*<sup>+/+</sup> and *Acss2*<sup>-/-</sup> male mice (n=15) fed a HFD for 12 weeks starting at 9 weeks of age were categorized into no to mild steatosis (liver weight < 1g), moderate steatosis (1.01g < liver weight < 1.6g), and severe steatosis (liver weight > 1.61g).

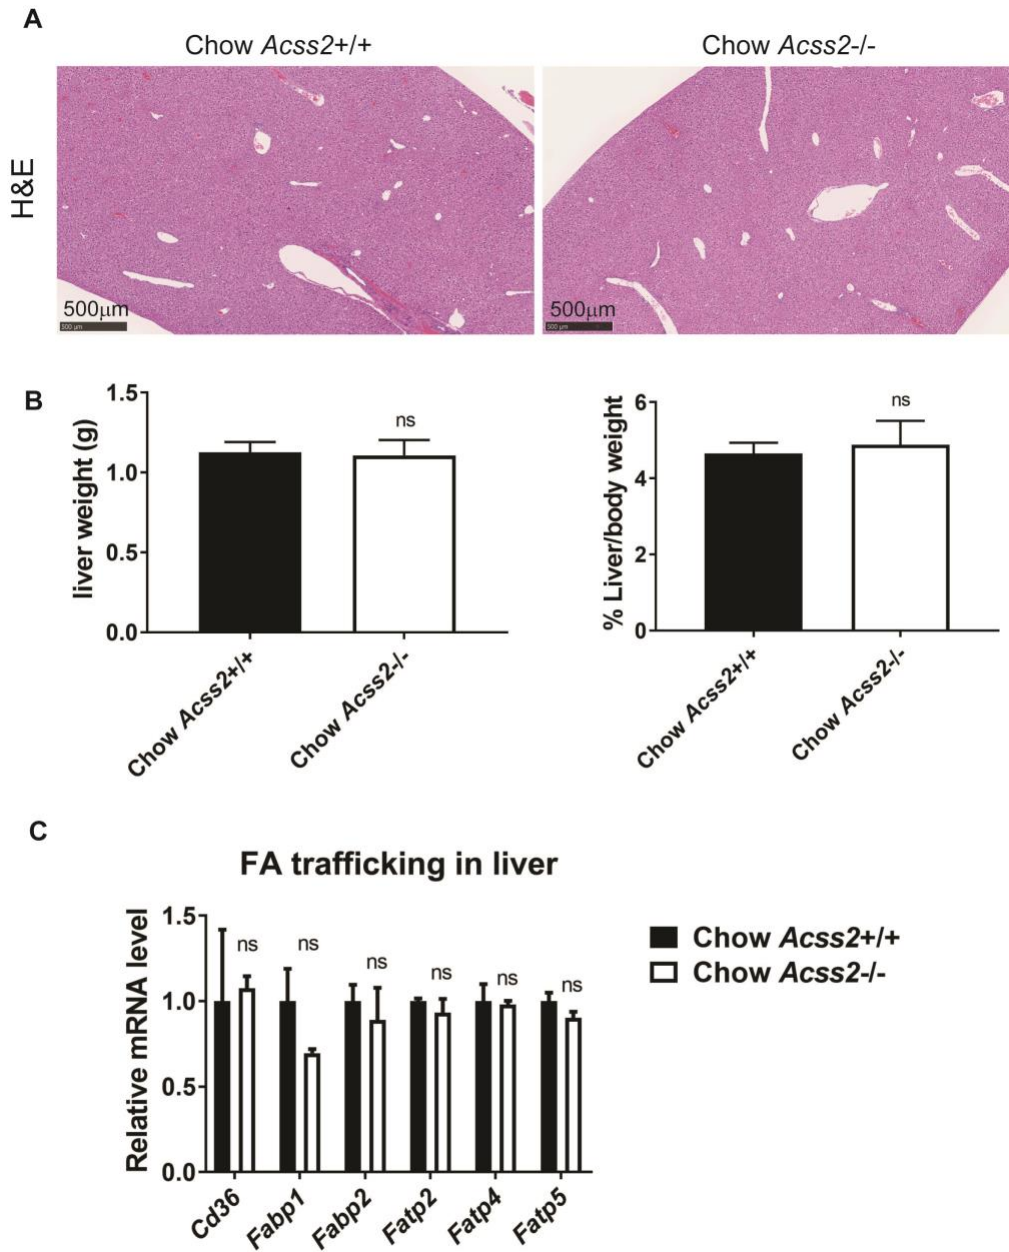

**Fig. S7.** (A) Haematoxylin and eosin (H&E) images of livers from additional representative male mice on chow diet. Scale bar, 500  $\mu$ m. (B) Liver weights were measured for *Acss2*<sup>+/+</sup> and *Acss2*<sup>-/-</sup> male mice (n=5) fed a chow diet, and normalized to body weight. (C) mRNA expression of FA transporters in liver of male mice on chow diet (n=3). All data reflect the mean  $\pm$  SEM. ns: not significant.



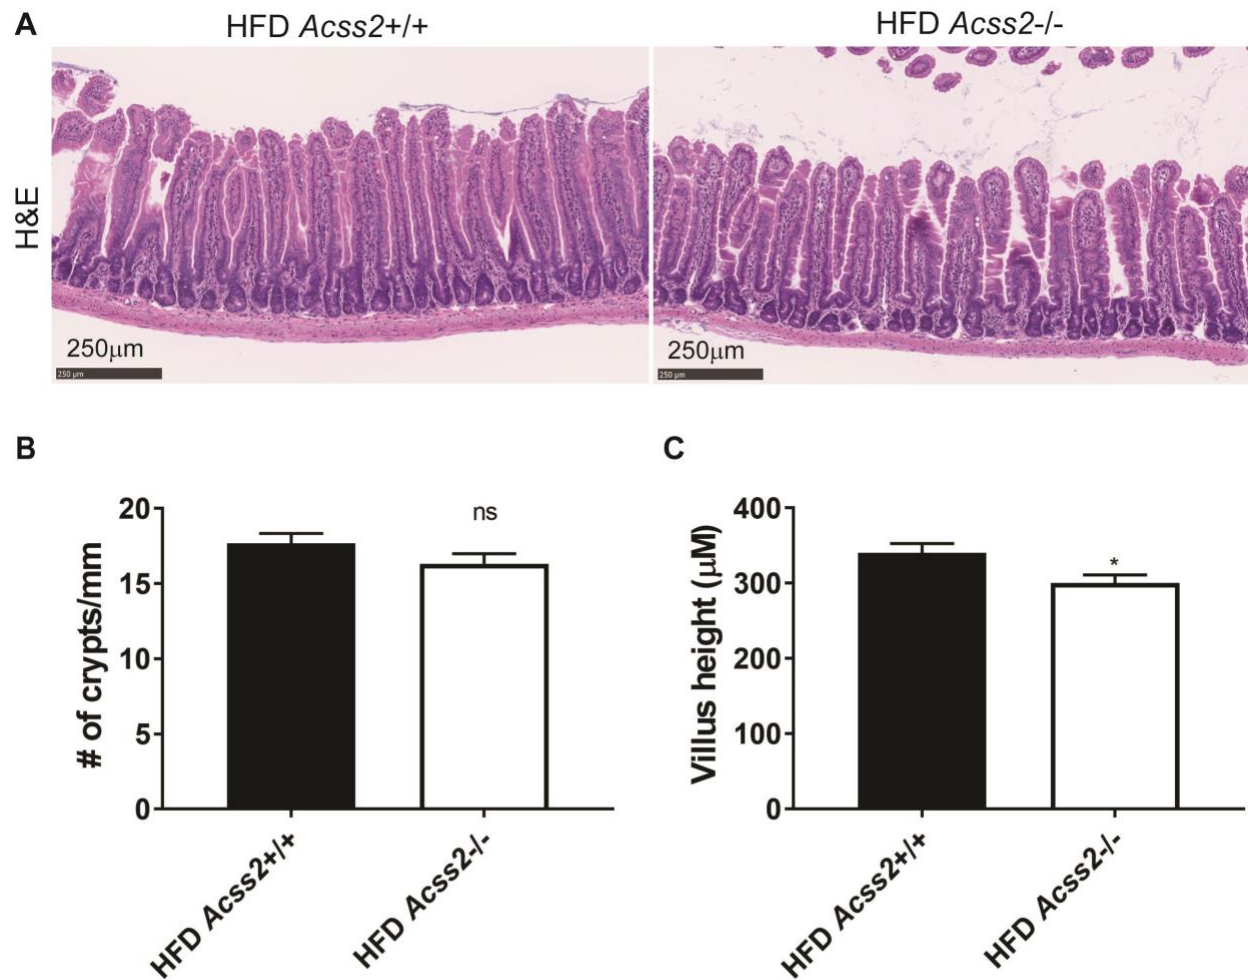

**Fig. S8.** (A) Haematoxylin and eosin (H&E) images of proximal intestinal samples from *Acss2*<sup>+/+</sup> and *Acss2*<sup>-/-</sup> male mice fed a HFD for 12 weeks starting at 9 weeks of age. Scale bar, 250 μm. (B-C) Crypt numbers (B) and villus height (C) of *Acss2*<sup>+/+</sup> and *Acss2*<sup>-/-</sup> male mice fed a HFD for 12 weeks (n=3).

A

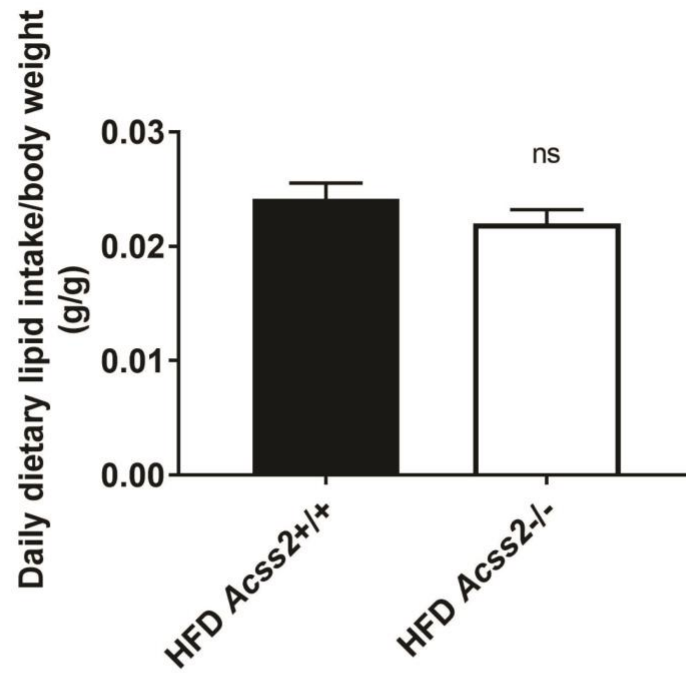

B

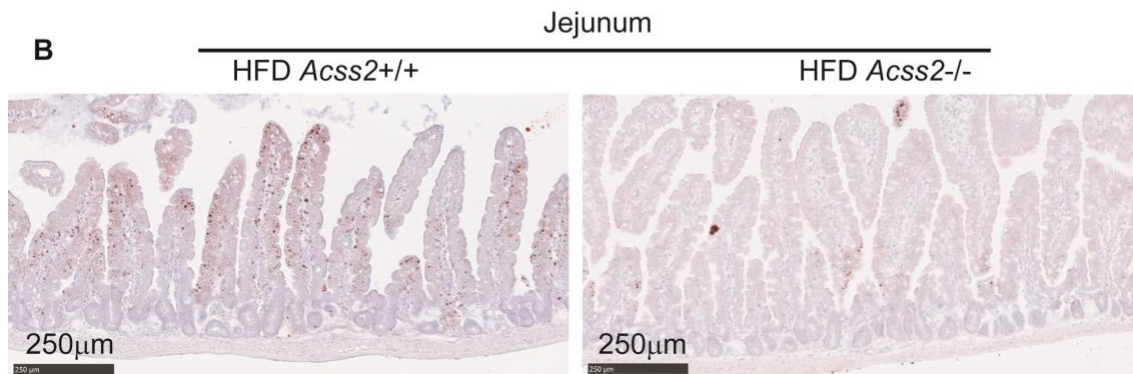

**Fig. S9.** (A) Daily dietary lipid intake was analyzed in male mice fed a HFD for 12 weeks (n=6), ns: not significant. (B) ORO staining of proximal intestines from a representative male mouse of the indicated genotype fed a HFD for 12 weeks. Scale bar, 250 µm.

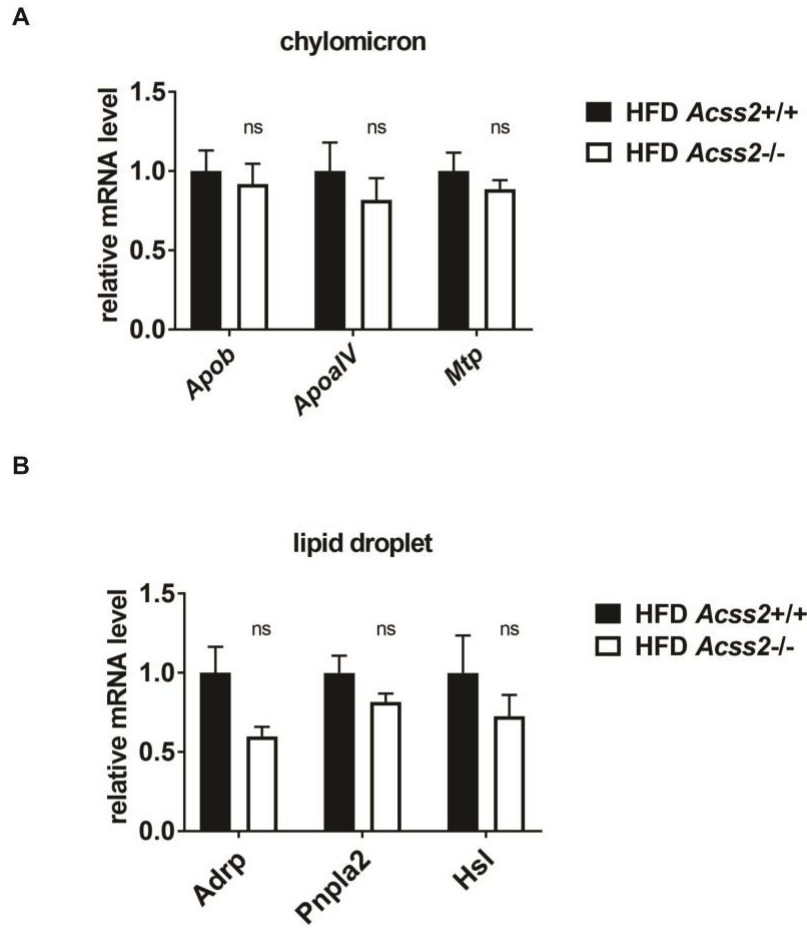

**Fig. S10.** (A-B) Intestinal mRNA profile of male mice fed a HFD for 12 weeks (n=4). Data reflect the mean  $\pm$  SEM. ns: not significant.

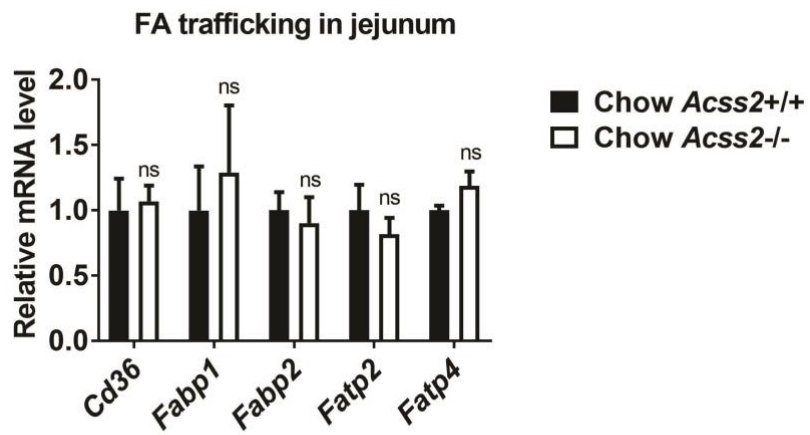

**Fig. S11.** Intestinal mRNA profile of male mice on chow diet (n=3). Data reflect the mean  $\pm$  SEM. ns: not significant.

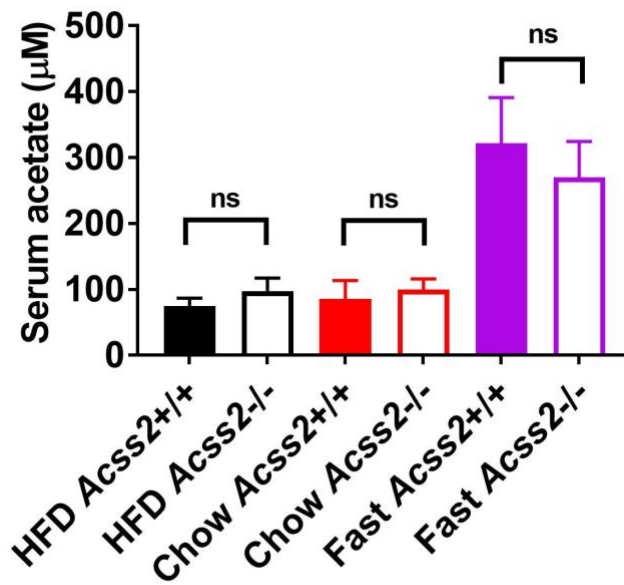

**Fig. S12.** Serum acetate concentration in *Acss2*<sup>+/+</sup> and *Acss2*<sup>-/-</sup> male mice fed HFD (n=11), chow diet (n=7), and 48 hours fast (n=6). Acetate level was measured using acetate colorimetric assay kit (Biovision, CA). Data reflect the mean  $\pm$  SEM. ns: not significant.

**Table S1. qPCR primers used in this study**

| gene name          | primer sequences                                                    |
|--------------------|---------------------------------------------------------------------|
| <i>cyclophilin</i> | 5'tggagagcaccaagacagaca ( F )<br>5'tgccggagtcgacaatgat ( R )        |
| <i>Cd36</i>        | 5'ggaactgtgggctcattgc ( F )<br>5'catgagaatgcctccaacac ( R )         |
| <i>Fabp1</i>       | 5'ggtgacaactttcaaaggcataaa ( F )<br>5'tgtcgcccaatgtcatggta ( R )    |
| <i>Fabp2</i>       | 5'ctcgggtgtaaactttccctacagtc ( F )<br>5'tttatttccctcaatggccag ( R ) |
| <i>Fatp2</i>       | 5'caacacaccgcagaaacca ( F )<br>5'atttcccagggtttttca ( R )           |
| <i>Fatp4</i>       | 5'acccaaagctgccattgtg ( F )<br>5'gcatgcggaatccaagtaca ( R )         |
| <i>Fatp5</i>       | 5'gaccactggactcccaaagc ( F )<br>5'gac agcacgttgctcacttgt ( R )      |
| <i>Ppara</i>       | 5'cgtacggcaatggctttatc ( F )<br>5'aacggcttctcaggttctt ( R )         |
| <i>Pparg</i>       | 5'cccaccaacttcggaatca ( F )<br>5'tgcbagtggtcttccatcac ( R )         |
| <i>Srebp1a</i>     | 5'ggccgagatgtgcaact ( F )<br>5'ttgtgatgagctggagcatgt ( R )          |
| <i>Srebp1c</i>     | 5'ggagccatggattgcacatt ( F )<br>5'ggcccgggaagtcaactgt ( R )         |
| <i>Rxra</i>        | 5'tgccatcccctcaggaaa ( F )<br>5'gcbgtccccacagatagc ( R )            |
| <i>Lxrb</i>        | 5'ctcccaccacgcttacac ( F )<br>5'gccctaacctctcactca ( R )            |
| <i>Acca</i>        | 5'ggcagctctggaggtgatg ( F )<br>5'tccttaagctggcgggtgtt ( R )         |
| <i>Fas</i>         | 5'gctgcggaaacttcaggaaat ( F )<br>5'agagacgtgtcactcctggactt ( R )    |
| <i>Scd1</i>        | 5'ccggagacccttagatcga ( F )<br>5'tagcctgtaaaagatttctgcaaac ( R )    |
| <i>Elovl2</i>      | 5'tcaatgcttcttgacaacatg ( F )<br>5'ggtaagagtccagcaggaacca ( R )     |
| <i>Hcs</i>         | 5'gccgtgaactgggtcgaa ( F )<br>5'gcatatatagcaatgtctcctgcaa ( R )     |
| <i>Hcr</i>         | 5'cttgtggaatgccttgattg ( F )<br>5'agccgaagcagcatgat ( R )           |
| <i>Dhcr24</i>      | 5'aggcagctggagaagttgtg ( F )<br>5'cctcgggttcatatagcaatc ( R )       |
| <i>Lss</i>         | 5'gtggtccgctcttctcttg ( F )                                         |

5'agctggcagagagatgtgtga (R )  
*Gpat1* 5'caacaccatccccgacatc (F )  
 5'gtgaccttcgattatgcgatca (R )  
*Acox1* 5'ctgctcagcaggagaaatgg (F )  
 5'tgggcgtaggtgccaaatta (R )  
*Acox2* 5'gacggctctgaacgcattt (F )  
 5'cattcatggcaataccatgtaagt (R )  
*Ehhadh* 5'ATGGCTGAGTATCTGAGGCTG (F )  
 5'GGTCCAAACTAGCTTTCTGGAG (R )  
*Dbp* 5'cactgtgtgctgttaaaggagtca (F )  
 5'cactcctgtggatcgagaa (R )  
*Acaa1* 5'gcagaagcaggatgactttgc (F )  
 5'caatctcagcacggagcat (R )  
*Scp2* 5'CCTTCTGTCGCTTTGAAATCTCC (F )  
 5'GCTTCCTTTGCCATATCAGGAT (R )  
*Acs15* 5'gaaagcctcactcggaagct (F )  
 5'ttgtgaataccaacaggaaattca (R )  
*Mgat2* 5'ccttcgcggtccttcagt (F )  
 5'gaggcctacgaagatgacgat (R )  
*Dgat1* 5'ggaatatccccgtgcacaa (F )  
 5'catttgctgctgccatgct (R )  
*Dgat2* 5'ccgcaaaggctttgtgaa (F )  
 5'ggaataagtgggaaccagatcag (R )  
*Apob* 5'cgtgggctccagcattcta (F )  
 5'tcaccagtatttctgcctttg (R )  
*apoAIV* 5'acagtttcagaagacggatgtca (F )  
 5'cgtactagcatcccaagttg (R )  
*Mtp* 5'cctaccaggcccaacaagac (F )  
 5'cgctcaattttgcatgtatcc (R )  
*Adrp* 5'gacctctgcggccatgac (F )  
 5'gtattggcaaccgcaattgt (R )  
*Pnpla2* 5'ccgctggagagtgcagtgt (F )  
 5'caccggatatcttcaggacat (R )  
*Hsl* 5'cctcatggctcaactcc (F )  
 5'ggttcttgactatgggtga (R )
